# Supplementary material
Source: Research Square preprint supplement (doi:10.21203/rs.3.rs-9116503/v1)
Supplement: Supplementary file 1 [file 9c6075f08888f12fcbf6c86a.pdf]

# Supplementary Tables S1–S7

## Structural Barriers to Health Services and Child Nutrition in Rohingya Camps

**Authors:** Dr Ahmed et al. **Date:** March 2026

**Dataset:** IFPRI replication dataset – Harvard Dataverse DOI: 10.7910/DVN/5BAN6C

**Contents:** Tables S1–S7, Figures S1–S4 (placeholders), STROBE note, analysis README

### CONTENTS

|                                                                               |                  |
|-------------------------------------------------------------------------------|------------------|
| Supplementary Table S1 – Healthcare Access Index: item wording and coding     | 5 items          |
| Supplementary Table S2 – EFA output for Healthcare Access Index               | psychometrics    |
| Supplementary Table S3 – Baseline balance diagnostics (voucher vs in-kind)    | 6 covariates     |
| Supplementary Table S4 – Propensity score model and diagnostics               | PS summary       |
| Supplementary Table S5 – IPW diagnostics (stabilised weights)                 | IPW              |
| Supplementary Table S6 – Full regression tables: stunting and wasting (M1–M4) | key coefficients |
| Supplementary Table S7 – Subgroup analyses by Healthcare Access Index tertile | n=523            |
| Supplementary Figures S1–S4 – Figure captions and placeholders                |                  |

### SUPPLEMENTARY TABLE S1

#### Healthcare Access Index: Item Wording and Coding

The Healthcare Access Index combined five survey items covering the AAAQ (availability, accessibility, acceptability, quality) dimensions. All items were reverse-coded where necessary so that higher values indicate greater access barriers. Continuous items were standardised (z-scores) prior to factor analysis.

| Item code         | Survey item wording                                                   | Coding used in index                                    |
|-------------------|-----------------------------------------------------------------------|---------------------------------------------------------|
| <b>DIST_MIN</b>   | How many minutes does it take to walk to the nearest health facility? | Continuous; minutes; standardised (z-score)             |
| <b>TRANS_COST</b> | Typical transport cost to reach the facility (local currency)         | Continuous; winsorised at 99th percentile; standardised |
| <b>STOCKOUT</b>   | How often are medicines unavailable at your usual clinic?             | Ordinal: 0 = Never · 1 = Rarely · 2 = Often             |
| <b>OVERCROWD</b>  | How crowded is the clinic when you visit?                             | Likert: 1 = Not crowded → 5 = Very crowded              |

| Item code                                                                                                                                                                                            | Survey item wording                                                            | Coding used in index             |
|------------------------------------------------------------------------------------------------------------------------------------------------------------------------------------------------------|--------------------------------------------------------------------------------|----------------------------------|
| <b>FORGONE</b>                                                                                                                                                                                       | In the past 3 months, did you forgo a needed visit because of access barriers? | Binary: 0 = No · 1 = Yes         |
| <i>Note: Items are sourced from the IFPRI survey instrument. Composite index standardised to mean 0, SD 1 (z-score). Higher index values indicate greater structural healthcare access barriers.</i> |                                                                                |                                  |
| <b>SUPPLEMENTARY TABLE S2</b>                                                                                                                                                                        |                                                                                |                                  |
| <b>Exploratory Factor Analysis (EFA) Output — Healthcare Access Index</b>                                                                                                                            |                                                                                |                                  |
| EFA was conducted on the polychoric correlation matrix of the five access items, pooled across 20 imputations. A single dominant factor was retained based on eigenvalue >1 and interpretability.    |                                                                                |                                  |
| Statistic                                                                                                                                                                                            | Value                                                                          | Notes                            |
| Number of items                                                                                                                                                                                      | 5                                                                              |                                  |
| Extraction method                                                                                                                                                                                    | EFA — polychoric correlations                                                  | Appropriate for mixed item types |
| Number of factors retained                                                                                                                                                                           | 1                                                                              | Eigenvalue >1 criterion          |
| <b>Eigenvalue (factor 1)</b>                                                                                                                                                                         | <b>2.34</b>                                                                    | Single dominant factor           |
| <b>% variance explained (factor 1)</b>                                                                                                                                                               | <b>47.0%</b>                                                                   |                                  |
| KMO measure of sampling adequacy                                                                                                                                                                     | 0.72                                                                           | Acceptable (≥0.60)               |
| Bartlett's test of sphericity                                                                                                                                                                        | $\chi^2(10) = 312.4, p < 0.001$                                                | Factor analysis justified        |
| <b>FACTOR LOADINGS</b>                                                                                                                                                                               |                                                                                |                                  |
| DIST_MIN (walking distance)                                                                                                                                                                          |                                                                                | 0.72                             |
| TRANS_COST (transport cost)                                                                                                                                                                          |                                                                                | 0.68                             |
| STOCKOUT (medicine stockouts)                                                                                                                                                                        |                                                                                | 0.61                             |
| OVERCROWD (clinic overcrowding)                                                                                                                                                                      |                                                                                | 0.59                             |
| FORGONE (foregone visits)                                                                                                                                                                            |                                                                                | 0.55                             |
| <b>Cronbach's <math>\alpha</math> (internal consistency)</b>                                                                                                                                         | <b>0.78</b>                                                                    | Acceptable (≥0.70)               |

| Statistic     | Value                | Notes                                   |
|---------------|----------------------|-----------------------------------------|
| Index scaling | Standardised z-score | Mean 0, SD 1; higher = greater barriers |

Note: Full EFA output including pooled factor loadings with standard errors and item-level descriptives available in *Table\_S2\_full.csv*. The 47% variance explained by a single factor is moderate; the remaining variance may reflect distinct sub-dimensions (geographic, financial, supply-side) not disaggregated by this composite index.

### SUPPLEMENTARY TABLE S3

#### Baseline Balance Diagnostics — Voucher vs In-Kind (Selected Covariates)

Means, standard deviations, and standardised differences for key covariates by treatment group before propensity score adjustment. Standardised differences >0.10 are flagged as potentially imbalanced.

| Covariate                           | Voucher mean (SD) | In-kind mean (SD) | Std diff |
|-------------------------------------|-------------------|-------------------|----------|
| Maternal education (years)          | 2.1 (1.8)         | 1.6 (1.7)         | 0.29     |
| Household size                      | 6.2 (2.1)         | 6.5 (2.3)         | -0.13    |
| Dietary diversity score (0–7)       | 3.4 (1.1)         | 3.1 (1.2)         | 0.26     |
| Proportion in camp block A          | 0.34              | 0.48              | -0.28    |
| Recent child illness (past 2 weeks) | 0.22              | 0.24              | -0.05    |
| Baseline HAZ mean                   | -1.45 (1.12)      | -1.62 (1.18)      | 0.15     |

Values in red or amber indicate standardised difference >0.10 — flagged for potential imbalance. PS and IPW methods were used to improve covariate balance; post-weighting diagnostics are in Supplementary Table S4.

### SUPPLEMENTARY TABLE S4

#### Propensity Score Model and Diagnostics

Propensity scores were estimated using logistic regression. Balance was assessed using standardised differences before and after PS adjustment.

| Diagnostic item                               | Value                                                                                                                                      | Notes                   |
|-----------------------------------------------|--------------------------------------------------------------------------------------------------------------------------------------------|-------------------------|
| PS model type                                 | Logistic regression                                                                                                                        |                         |
| Covariates in PS model                        | Maternal education; household size; dietary diversity; child age; child sex; recent illness; camp block dummies; household head employment |                         |
| C-statistic (AUC)                             | 0.62                                                                                                                                       | Moderate discrimination |
| Mean PS (voucher group)                       | 0.42                                                                                                                                       | Before weighting        |
| Mean PS (in-kind group)                       | 0.36                                                                                                                                       | Before weighting        |
| <b>Std diff (mean PS) after PS adjustment</b> | <b>0.03</b>                                                                                                                                | Good balance achieved   |
| Max std diff (pre-PS)                         | 0.29                                                                                                                                       | Maternal education      |
| Max std diff (post-PS)                        | 0.06                                                                                                                                       | Below 0.10 threshold    |

Note: Adjusted OR for voucher following PS covariate adjustment: 0.74 (95% CI 0.45–1.22,  $p=0.24$ ). Consistent with primary model (M3) result.

#### SUPPLEMENTARY TABLE S5

### IPW Diagnostics — Stabilised Inverse Probability Weights

Stabilised weights were trimmed at the 99th percentile to reduce the influence of extreme values. The effective sample size after weighting is reported.

| Metric                                  | Value      | Notes                           |
|-----------------------------------------|------------|---------------------------------|
| Mean stabilised weight                  | 1.00       | Expected for stabilised weights |
| SD stabilised weight                    | 0.42       | After trimming                  |
| Median stabilised weight                | 0.98       |                                 |
| Max weight (pre-trim)                   | 8.7        | Extreme value                   |
| Max weight (post-trim)                  | 3.2        | Trimmed at 99th percentile      |
| <b>Effective sample size (weighted)</b> | <b>498</b> | Slight reduction from $n=523$   |
| Proportion of weights trimmed           | 0.8%       | Minimal trimming                |

Note: IPW-adjusted OR for voucher: 0.77 (95% CI 0.48–1.24,  $p=0.28$ ). Consistent with primary and PS-adjusted estimates.

SUPPLEMENTARY TABLE S6

Full Regression Tables — Key Coefficients (M1–M4)

Survey-weighted logistic regressions pooled across 20 MICE imputations. All ORs are on the odds ratio scale; 95% CIs and p-values shown. Full coefficient tables including all covariates are in Table\_S6\_full\_M1\_M4\_stunting.csv and Table\_S6\_full\_M1\_M4\_wasting.csv.

TABLE S6A — PRIMARY OUTCOME: STUNTING (HAZ < -2)

| Model                     | Voucher OR (95% CI)                 | Access Index OR (per SD)            | Recent illness OR                   |
|---------------------------|-------------------------------------|-------------------------------------|-------------------------------------|
| M1 — Crude                | 0.66 (0.44–1.00)<br><i>p</i> =0.048 | –                                   | –                                   |
| M2 — + Household controls | 0.70 (0.44–1.13)<br><i>p</i> =0.146 | –                                   | –                                   |
| M3 — + Access Index       | 0.76 (0.46–1.25)<br><i>p</i> =0.275 | 1.28 (1.03–1.59)<br><i>p</i> =0.026 | 1.45 (1.02–2.06)<br><i>p</i> =0.038 |
| M4 — + Interaction        | 0.78 (0.47–1.31)<br><i>p</i> =0.343 | 1.27 (1.02–1.58)<br><i>p</i> =0.030 | 1.44 (1.01–2.05)<br><i>p</i> =0.044 |

M4 interaction term (Voucher × Access Index): OR = 0.98 (95% CI 0.72–1.33), *p*=0.88 — not significant. Voucher main effect in M4 is interpretable at mean access index value.

TABLE S6B — SECONDARY OUTCOME: WASTING (WHZ < -2)

| Model               | Voucher OR (95% CI)                | Access Index OR (per SD)           | Recent illness OR                   |
|---------------------|------------------------------------|------------------------------------|-------------------------------------|
| M1 — Crude          | 0.89 (0.55–1.44)<br><i>p</i> >0.65 | –                                  | –                                   |
| M3 — + Access Index | 0.93 (0.56–1.55)<br><i>p</i> >0.65 | 1.18 (0.88–1.58)<br><i>p</i> >0.10 | 2.10 (1.40–3.15)<br><i>p</i> <0.001 |

TABLE S6C — MODEL DIAGNOSTICS SUMMARY

| Diagnostic                       | Value                          | Threshold / Notes                 |
|----------------------------------|--------------------------------|-----------------------------------|
| VIF (max across predictors)      | < 3                            | No multicollinearity concern (<5) |
| Events per variable (EPV)        | > 10                           | Meets minimum threshold           |
| AIC/BIC — favoured specification | Spline age + Access Index (M3) | Lower AIC/BIC vs M1, M2           |

| Diagnostic                             | Value | Threshold / Notes                           |
|----------------------------------------|-------|---------------------------------------------|
| E-value for adjusted OR (M3, stunting) | 1.56  | Modest robustness to unmeasured confounding |

Full coefficient tables with all covariates, standard errors, z-statistics, and p-values are provided in the accompanying CSV files.

#### SUPPLEMENTARY TABLE S7

### Subgroup Analyses by Healthcare Access Index Tertile

Exploratory stratified analysis by Healthcare Access Index tertile. Adjusted ORs from M3 model estimated within each tertile stratum. Sample sizes within strata are limited; these analyses are hypothesis-generating only.

| Access tertile                     | N   | Stunting % (n) | Adj. OR (M3) | 95% CI    | p     |
|------------------------------------|-----|----------------|--------------|-----------|-------|
| <b>Low barriers</b> (tertile 1)    | 174 | 28.7% (50)     | 0.58         | 0.31–1.08 | 0.086 |
| <b>Medium barriers</b> (tertile 2) | 175 | 34.3% (60)     | 0.82         | 0.44–1.53 | 0.53  |
| <b>High barriers</b> (tertile 3)   | 174 | 41.6% (72)     | 0.95         | 0.52–1.74 | 0.87  |
| <b>Total</b>                       | 523 | 34.8% (182)    | –            | –         | –     |

Interaction test (Voucher × Access tertile):  $p = 0.41$  – not statistically significant. The directional pattern (lower OR in low-barrier tertile, approaching null in high-barrier tertile) is consistent with the study hypothesis but should be interpreted as exploratory given limited stratum sample sizes and non-significant formal interaction test.

#### SUPPLEMENTARY FIGURES S1–S4

### Figure Captions

#### Figure S1 – Forest plot of voucher ORs across nested models (M1–M4)

Point estimates and 95% confidence intervals for the voucher effect from M1–M4 for stunting and wasting outcomes. OR axis on log scale; vertical reference line at OR = 1. File: Figure\_S1.png

#### Figure S2 – E-value plot for adjusted stunting OR (M3)

E-value curve showing the minimum required confounder risk ratio (with both exposure and outcome) to fully explain away the observed association. Observed adjusted OR = 0.76; E-value = 1.56. File: Figure\_S2.png

### **Figure S3 – Propensity score overlap and IPW weight distribution**

Panel A: PS density plots by treatment group before and after weighting, demonstrating overlap. Panel B: Histogram of stabilised weights after trimming at the 99th percentile. File: Figure\_S3 .png

### **Figure S4 – MICE convergence diagnostics**

Trace plots for imputed means across 20 iterations for DIST\_MIN, TRANS\_COST, and maternal education. Convergence is indicated by stable, well-mixing chains. File: Figure\_S4 .png

## **REPORTING STANDARDS**

### **STROBE Compliance Note**

This manuscript was prepared in accordance with the STROBE (Strengthening the Reporting of Observational Studies in Epidemiology) Statement for cross-sectional studies. A completed STROBE checklist mapping all 22 items to page/section references in the main manuscript is provided as a separate submission file (STROBE\_checklist .pdf). All 22 items are addressed; items 12–16 (statistical methods, quantitative variables, bias, study size, missing data) are reported in Methods §3 and Supplementary Tables S3–S5.
